# Supplementary material
Source: publisher site journal article supplement (https://www.dovepress.com/article/398997)

1 **Figures Legend:**

2 **Supplemental Information Figure S1. Examination information of the CRC.**

3 A, colonoscopy; B, biopsy pathology; C, surgical pathology. APCS: 2, moderate risk;  
4 FIT: 2560 ng/mL, positive; sDNA test: CT value 31.83, positive. Colonoscopy: From  
5 the anus 15-19 cm, circumferential ulcerative occupancy, diameter 4×5 cm. Biopsy  
6 pathology: (15-19 cm from the anal mucosa) tubular-villous adenoma with gland  
7 HGIN. Surgical pathology: one section of intestinal tube, 9 cm long, 5.5 cm  
8 circumference an ulcer mass was seen on the mucosal surface, 5×5×1 cm, 1.3 cm  
9 from one side and 3 cm from the other side. Pathological diagnosis: specimen type:  
10 intestinal segment resection; tumor location: rectum; resection specimen size: 9 cm  
11 long, circumference diameter 5.5cm; gross tumor type: ulcer type; tumor size: 5×5×1  
12 cm (long diameter × transverse diameter × vertical diameter, cm); histological  
13 diagnosis: tubular-papillary adenocarcinoma; lymph node metastasis: total: (0 / 21)  
14 (number of metastases / total lymph nodes). Mesenteric lymph nodes (0 / 6),  
15 surrounding lymph nodes (0 / 15); distance from upper cut end of tumor resection: 1.3  
16 cm; distance from tumor resection / dentine: 3 cm; depth of invasion: infiltration to  
17 subserosa; histological differentiation: moderate differentiation; thrombolysis: no  
18 tumor in artery; no nerve invasion; no cancer; lower resection: no cancer; another  
19 resection: no carcinoma. Abbreviations: APCS, Asia-Pacific Colorectal Screening;  
20 CRC, colorectal cancer; CT, cycling threshold; FIT, fecal immunochemical test;  
21 HGIN, high-grade intraepithelial neoplasia; sDNA, stool DNA.

22 **Supplemental Information Figure S2. Examination information of the HGIN.**

23 A, colonoscopy; B, biopsy pathology; C, surgical pathology. APCS: 5, high risk; FIT:  
24 2331 ng/mL, positive; sDNA test: CT value 37.22, positive. Colonoscopy: multiple  
25 colorectal giant adenomas, thick and long ties, diameter 1.5-1.8 cm. Pathology: colon

26 descendens ring peripheral ulcer type occupied 40mm (descending colon mucosa)  
27 gland severe dysplasia, cancerous. Abbreviations: APCS, Asia-Pacific Colorectal  
28 Screening; CT, cycling threshold; FIT, fecal immunochemical test; HGIN, high-grade  
29 intraepithelial neoplasia; sDNA, stool DNA.

30 **Supplemental Information Figure S3. Three positive results of the AA.**

31 A, colonoscopy; B, biopsy pathology; C, surgical pathology. APCS: 4, high risk; FIT:  
32 293 ng/mL, positive; sDNA test: CT value 37.52, positive. Colonoscopy: sigmoid  
33 colon giant adenomas, thick and long ties, diameter 3.0 cm. Biopsy pathology:  
34 ascending colon mucosa tubular adenoma with a LGIN; transverse colon mucosa  
35 tubular adenoma with LGIN; the rectum borders with the sigmoid colon mucosa  
36 tubular adenoma with gland LGIN. Surgical pathology: ascending colon mucosa  
37 tubular villous adenoma with LGIN; lower colon mucosa tubular adenoma with gland  
38 LGIN; sigmoid colon mucosa tubular villous adenoma with LGIN. Abbreviations:  
39 AA, advanced adenoma; APCS, Asia-Pacific Colorectal Screening; CT, cycling  
40 threshold; FIT, fecal immunochemical test; LGIN, low-grade intraepithelial neoplasia;  
41 sDNA, stool DNA.

42 **Supplemental Information Figure S4. Two positive results of the AA.**

43 A, colonoscopy; B, biopsy pathology; C, surgical pathology. APCS: 4, high risk;  
44 FIT:1 ng/mL, negative; sDNA test: CT value 37.67, positive. Colonoscopy: colon  
45 ascenden a adenoma, diameter 1.2×1.0 cm. Biopsy pathology: (cecum) tubular villous  
46 adenoma with LGIN. (Rising colon) tubular villous adenoma with LGiN. (Sigmoid  
47 colon) Tubular adenoma with gland LGIN. Surgical pathology: (ascending colon  
48 mucosa) tubular-villous adenoma, LGIN. Abbreviations: AA, advanced adenoma;  
49 APCS, Asia-Pacific Colorectal Screening; CT, cycling threshold; FIT, fecal  
50 immunochemical test; LGIN, low-grade intraepithelial neoplasia; sDNA, stool DNA.

**Supplemental Information Table S1. Asia-Pacific Colorectal Screening score for prediction of risk for colorectal advanced neoplasia**

| Risk factor                                                    | Criteria        | Points |
|----------------------------------------------------------------|-----------------|--------|
| Age                                                            | <50             | 0      |
|                                                                | 50-69           | 2      |
|                                                                | ≥70 years       | 3      |
| Gender                                                         | Female          | 0      |
|                                                                | Male            | 1      |
| Family history of colorectal cancer in a first-degree relative | Absent          | 0      |
|                                                                | Present         | 2      |
| Smoking                                                        | Never           | 0      |
|                                                                | Current or past | 1      |

**Supplemental Information Table S2. ROC curves comparing different detection schemes for ACN**

| Primary screening group | AUC   | SE    | <i>p</i> value | 95%CI       |
|-------------------------|-------|-------|----------------|-------------|
| APCS                    | 0.448 | 0.078 | 0.505          | 0.294-0.601 |
| FIT                     | 0.679 | 0.074 | 0.023          | 0.534-0.824 |
| sDNA test               | 0.666 | 0.075 | 0.035          | 0.520-0.812 |
| APCS + FIT              | 0.511 | 0.079 | 0.886          | 0.357-0.665 |
| APCS + sDNA test        | 0.532 | 0.078 | 0.680          | 0.379-0.686 |
| FIT + sDNA test         | 0.672 | 0.074 | 0.029          | 0.527-0.817 |
| APCS + FIT + sDNA test  | 0.500 | 0.079 | >0.999         | 0.346-0.654 |

Abbreviations: ACN, advanced colorectal neoplasia; APCS, Asia-Pacific Colorectal Screening; AUC, area under area under the receiver operating characteristic curve; ROC, receiver operating characteristic; sDNA, stool DNA; SE, standard error.

**Supplemental Information Table S3. ROC curves comparing different detection schemes for NAA**

| Primary screening group | AUC   | SE    | <i>p</i> value | 95%CI       |
|-------------------------|-------|-------|----------------|-------------|
| APCS                    | 0.432 | 0.068 | 0.324          | 0.299-0.565 |
| FIT                     | 0.515 | 0.069 | 0.829          | 0.380-0.650 |
| sDNA test               | 0.608 | 0.066 | 0.120          | 0.478-0.738 |
| APCS + FIT              | 0.425 | 0.067 | 0.275          | 0.293-0.556 |
| APCS + sDNA test        | 0.507 | 0.069 | 0.916          | 0.371-0.643 |
| FIT + sDNA test         | 0.611 | 0.067 | 0.107          | 0.480-0.743 |
| APCS + FIT + sDNA test  | 0.500 | 0.069 | >0.999         | 0.364-0.636 |

Abbreviations: APCS, Asia-Pacific Colorectal Screening; AUC, area under area under the receiver operating characteristic curve; NAA, nonadvanced adenoma; ROC, receiver operating characteristic; sDNA, stool DNA; SE, standard error.

**Supplemental Information Table S4. ROC curves comparing different detection schemes for positive results**

| Primary screening group | AUC   | SE    | <i>p</i> value | 95%CI       |
|-------------------------|-------|-------|----------------|-------------|
| APCS                    | 0.438 | 0.062 | 0.329          | 0.316-0.559 |
| FIT                     | 0.575 | 0.061 | 0.241          | 0.456-0.694 |
| sDNA test               | 0.629 | 0.059 | 0.044          | 0.513-0.745 |
| APCS + FIT              | 0.456 | 0.062 | 0.494          | 0.334-0.578 |
| APCS + sDNA test        | 0.517 | 0.065 | 0.796          | 0.390-0.643 |
| FIT + sDNA test         | 0.634 | 0.061 | 0.037          | 0.514-0.753 |
| APCS + FIT + sDNA test  | 0.500 | 0.064 | >0.999         | 0.375-0.625 |

Abbreviations: APCS, Asia-Pacific Colorectal Screening; AUC, area under area under the receiver operating characteristic curve; ROC, receiver operating characteristic; sDNA, stool DNA; SE, standard error.

Supplemental Information Figure S1.

A

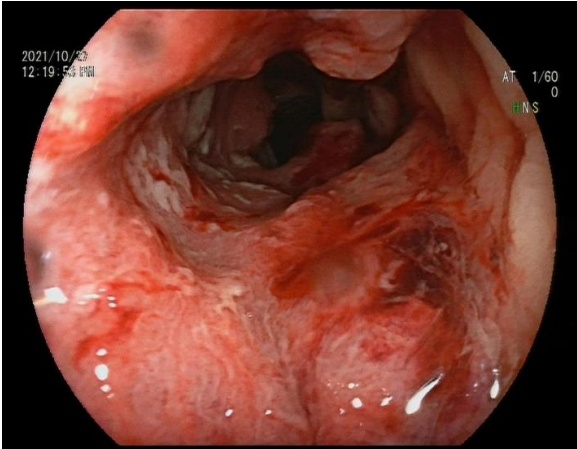

B

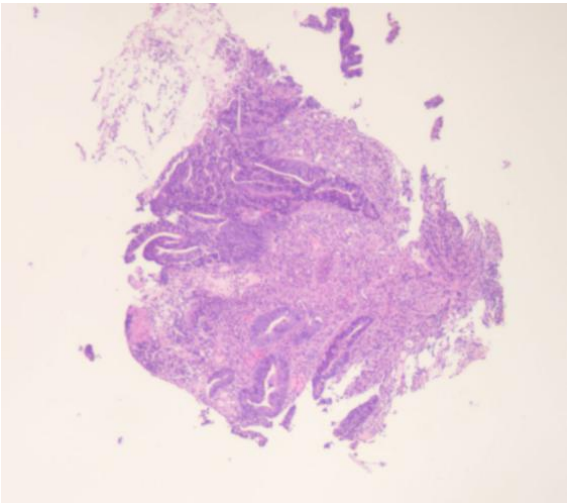

C

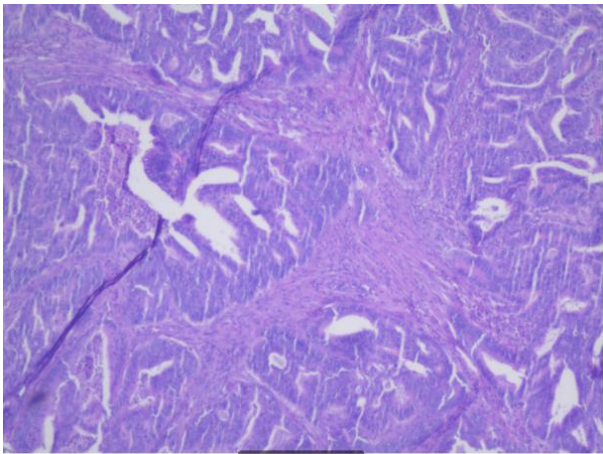

Supplemental Information Figure S2.

A

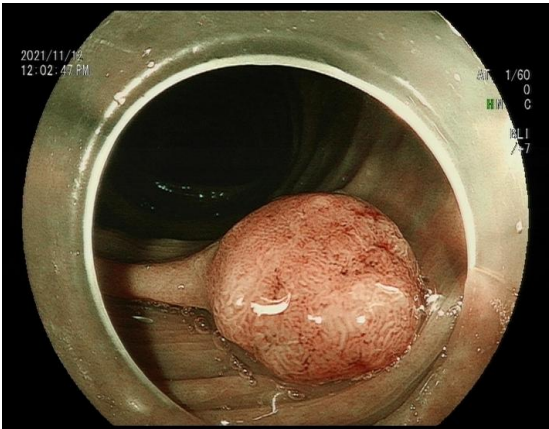

B

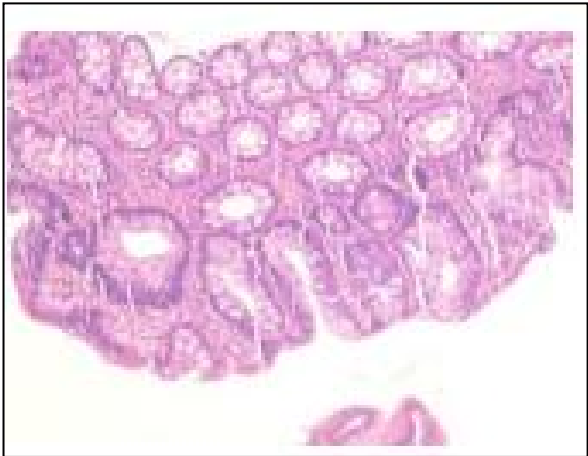

C

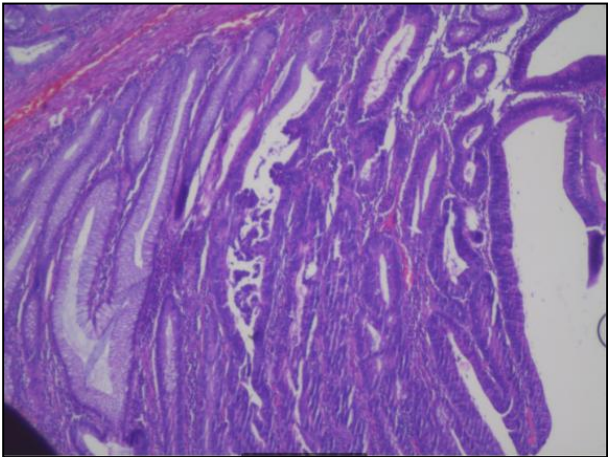

Supplemental Information Figure S3.

A

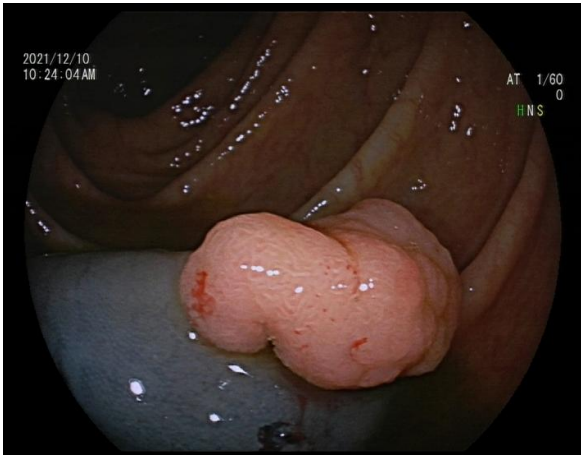

B

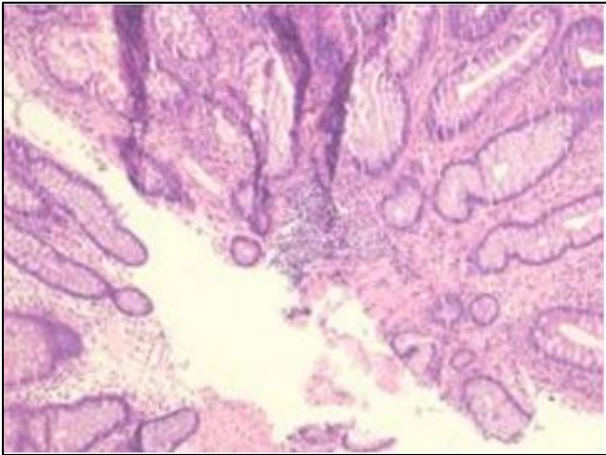

C

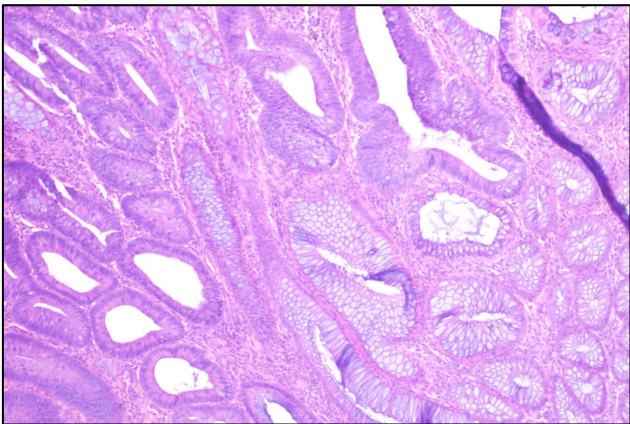



Supplemental Information Figure S4.

A

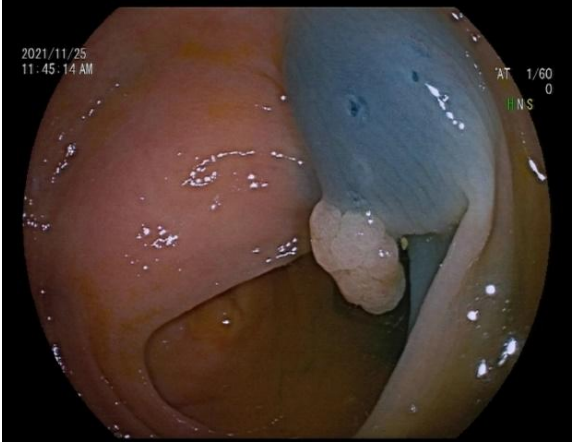

B

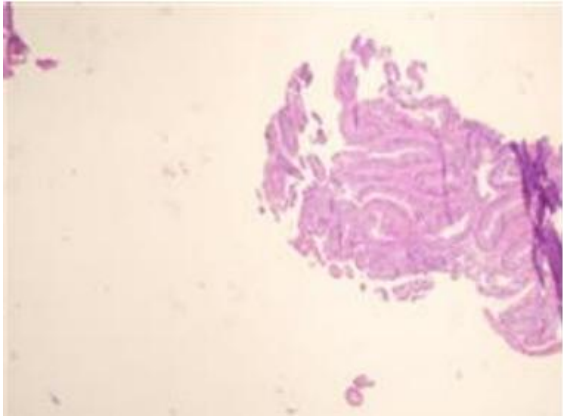

C

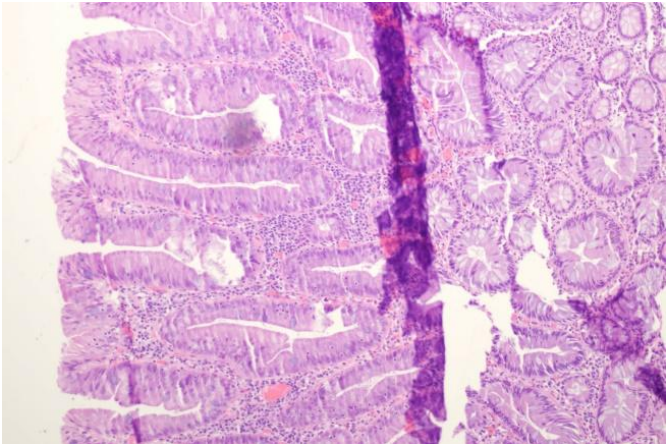

Supplement: Supplementary file 1 [file get_supplementary_file.php]
